# Supplementary material for: Feasibility of advancing the development of compact energy systems
Source: Royal Society of Chemistry journal article supplement (doi:10.1039/c9ra06039a), 2019-01-01
Supplement: c9ra06039a1.pdf [file c9ra06039a1.pdf]

### **Grinder for the compact energy system**

The circular saw blades are mounted on a shaft which is enclosed in a pipe with one end is open for the biomass intake and the other end is connected to the biomass dryer. The correlations developed by Mani et al. [1] were employed to estimate the energy requirement of reducing the biomass size to target size.

### **Air compressor and Pressure Swing Adsorption**

The ASPEN Plus simulation software is used to size the air compressor as well as to estimate the energy required to compress air to the target pressure. The pressure swing adsorption (PSA) unit with a silver exchanged Zeolite was employed to produce nearly pure oxygen [2]. The SuperPro Designer simulation software was used to determine the size, weight, and energy requirements of PSA unit. The data necessary for PSA unit modeling was obtained from Santos et al. [2].

### **Heat exchangers for the compact energy systems**

The compact heat exchangers with the high area density of around  $1000 \text{ m}^2/\text{m}^3$  were employed for heating and cooling purposes of the compact energy system [3]. Few examples of compact heat exchangers are brazed plate fin, diffusion bonded plate fin, printed circuit, polymer, metal foam heat exchangers, and Chart-fio heat exchangers [3]. The heat transfer area of the compact energy system was determined using the ASPEN Plus.

### **Gasification and Steam Reforming Reactors**

The catalytic plate reactor was selected for the gasification and steam reforming reactors as the feasibility of using coupled exothermic and endothermic reactions with the compact catalytic plate reactors have been demonstrated for various chemical reactions including catalytic methane steam reforming [3]. The necessary information for the simulation of conventional [4], catalytic [5], steam [6], supercritical [7], and microwave gasification [8] as well as steam reforming reactors [9] has attained from published literature. The RYIELD reactor model in ASPEN Plus was used to determine the energy balance for the catalytic plate reactor. The RSTOIC reactor mode was utilized for calculating energy balance for the steam reforming reactors. The volume of gasification and steam reforming reactors were calculated using residence time and mass flow rate. The thickness of a reactor based on the internal pressure, volume of reactor, and material (steel) density were used to determine the weight of gasification and steam reforming reactors.

### **Separation and Purification**

The product gas resulting from steam reforming of syngas consists of  $\text{CO}_2$ ,  $\text{CO}$ ,  $\text{H}_2$ ,  $\text{H}_2\text{O}$ ,  $\text{CH}_4$ ,  $\text{NH}_3$ , and may be  $\text{H}_2\text{S}$ . To use  $\text{H}_2$  in fuel cell, it must be separated and purified from the multi-component product gas mixture. The integration of PSA unit with Pd-membrane technology can be used to purify hydrogen [10,11]. The PSA unit with structurally arranged monolithic activated carbon material can be used to remove a significant amount of  $\text{CO}_2$ ,  $\text{CO}$ , and  $\text{H}_2\text{O}$  [10]. The optimal operating conditions of PSA column can be determined to remove  $\text{CO}_2$ ,  $\text{CO}$ , and  $\text{H}_2\text{O}$  from syngas using adsorption isotherms [10]. The hydrogen is separated from a stream leaving the PSA unit column using Pd-membrane [11]. The PSA unit was modeled using the SuperPro Designer

software and the modeling parameter values were obtained from Dunbar [11]. The Pd-membrane area was determined using empirical equations presented by Saltonstall [12]. The weight and volume of Pd-membrane process were calculated based on the hollow fiber membrane module design principles.

### Powered-Engine Component

The specific power and power density were used to estimate the weight and volume of gas engine, fuel cell, and sterling engines, respectively (Table S3).

**Table S1:** Ultimate analysis (wt/wt% dry basis) of biomass used to make hydrogen/producer gas with different types of gasification technologies

| Element  | Conventional gasification | Steam gasification | Catalytic gasification |
|----------|---------------------------|--------------------|------------------------|
| Ash      | 6                         | 0.34               | 0.5                    |
| Carbon   | 47.28                     | 44.75              | 51.26                  |
| Hydrogen | 5.06                      | 6.31               | 5.54                   |
| Oxygen   | 40.63                     | 46.87              | 42.29                  |
| Nitrogen | 0.8                       | 1.68               | 0.18                   |
| Sulfur   | 0.22                      | 0.05               | 0.23                   |

**Table S2:** Selected gasification temperatures for modeling purpose

| Type of gasification technology | Temperature (Celsius) | Residence time (s) |
|---------------------------------|-----------------------|--------------------|
| Conventional gasification       | 1100                  | 2                  |
| Steam gasification              | 900                   | 5                  |
| Catalytic gasification          | 750                   | 4                  |

**Table S3:** Conversion efficiency of hydrogen/hot producer to available energy, specific power, and power density of fuel cell, gas engine, and stirling engine

|                 | Conversion efficiency | Specific power (kW/kg) | Power density (kW/L) |
|-----------------|-----------------------|------------------------|----------------------|
| Fuel cell       | 55%                   | 1.4                    | 1.6                  |
| Gas engine      | 47.28                 | 0.46                   | 0.010                |
| Stirling engine | 5.06                  | 0.054                  | 0.010                |

Table S4: The data of operational time (h), target power (kW), and weight (kg) to generate Figure 4 in the manuscript

| Operational time | Power | Weight |
|------------------|-------|--------|
| 1                | 0.5   | 0.7    |
| 1                | 1     | 1.5    |
| 1                | 3     | 4.4    |
| 1                | 5     | 7.3    |
| 1                | 10    | 14.6   |
| 1                | 20    | 29.1   |
| 1                | 40    | 58.3   |
| 1                | 60    | 87.4   |
| 1                | 80    | 116.5  |
| 1                | 100   | 145.6  |
| 3                | 0.5   | 2      |
| 3                | 1     | 4      |
| 3                | 3     | 13     |
| 3                | 5     | 22     |
| 3                | 10    | 44     |
| 3                | 20    | 87     |
| 3                | 40    | 175    |
| 3                | 60    | 262    |
| 3                | 80    | 350    |
| 3                | 100   | 437    |
| 6                | 0.5   | 4      |
| 6                | 1     | 9      |
| 6                | 3     | 26     |
| 6                | 5     | 44     |
| 6                | 10    | 87     |
| 6                | 20    | 175    |
| 6                | 40    | 350    |
| 6                | 60    | 524    |
| 6                | 80    | 699    |
| 6                | 100   | 874    |
| 12               | 0.5   | 9      |
| 12               | 1     | 17     |
| 12               | 3     | 52     |
| 12               | 5     | 87     |
| 12               | 10    | 175    |
| 12               | 20    | 350    |
| 12               | 40    | 699    |
| 12               | 60    | 1049   |
| 12               | 80    | 1398   |

|    |     |      |
|----|-----|------|
| 12 | 100 | 1748 |
| 24 | 0.5 | 17   |
| 24 | 1   | 35   |
| 24 | 3   | 105  |
| 24 | 5   | 175  |
| 24 | 10  | 350  |
| 24 | 20  | 699  |
| 24 | 40  | 1398 |
| 24 | 60  | 2097 |
| 24 | 80  | 2796 |
| 24 | 100 | 3496 |

1. Mani, S.; Tabil, L.G.; Sokhansanj, S. "Grinding Performance and Physical Properties of Wheat and Barley Straws, Corn Stover and Switchgrass." *Biomass and Bioenergy*; Vol. 27(4), 2004; pp. 339-352.
2. J. C. Santos, P. Cruz, T. Regala, F. D. Magalhães, and A. Mendes. High-Purity Oxygen Production by Pressure Swing Adsorption, *Ind. Eng. Chem. Res.* **2007**, 46, 591-599
3. David Reay, Adam Harvey, Colin Ramshaw, *Process Intensification: Engineering for Efficiency, Sustainability and Flexibility*, Elsevier Science & Technology, 2013.
4. Ryan M. Swanson, Justinus A. Satrio, Robert C. Brown, Alexandru Platon, David D. Hsu, *Techno-Economic Analysis of Biofuels Production Based on Gasification*, NREL/TP-6A20-46587, 2010.
5. Pengmei Lv, Zhenhong Yuan, Chuangzhi Wu, Longlong Ma, Yong Chen, Noritatsu Tsubaki, *Bio-syngas production from biomass catalytic gasification*, *Energy Conversion and Management* 48 (2007) 1132–1139
6. Ningbo Gao, Aimin Li, Cui Quan, *A novel reforming method for hydrogen production from biomass steam gasification*, *Bioresource Technology* 100 (2009) 4271–4277.
7. Sonil Nanda, Jamie Isen, Ajay K. Dalai, Janusz A. Kozinski, *Gasification of fruit wastes and agro-food residues in supercritical water*, *Energy Conversion and Management* 110 (2016) 296–306.
8. Qinglong Xie, Fernanda Cabral Borges, Yanling Cheng, Yiqin Wan, Yun Li, Xiangyang Lin, Yuhuan Liu, Fida Hussain, Paul Chen, Roger Ruan, *Fast microwave-assisted catalytic gasification of biomass for syngas production and tar removal*, *Bioresource Technology* 156 (2014) 291–296
9. Alves et al., *Overview of hydrogen production technologies from biogas and the applications in fuel cells*, *International Journal of Hydrogen Energy*, 38 (1), 2013, Pages 5215-5225.

10. Querejeta et al., Carbon monoliths in adsorption-based post-combustion CO<sub>2</sub> capture, *Energy Procedia*, 2017, 114, 2017, 2341 – 2352.
11. Dunbar, Z., Hydrogen purification of synthetic water gas shift gases using microstructured palladium membranes, *Journal of Power Sources*, 2015, 297, 525-533
12. Saltonstall, C. W., Calculation of the membrane area required for gas separations, *J of Membrane Science*, Volume 32, Issues 2–3, July 1987, Pages 185-193
13. C. E. (Sandy) Thomas, Fuel Cell and Battery Electric Vehicles Compared, H<sub>2</sub> Gen Innovations, Inc.
- 14.
